# Supplementary material for: Peritumoral Tertiary Lymphoid Structures Correlate With Protective Immunity and Improved Prognosis in Patients With Hepatocellular Carcinoma
Source: PubMed Central journal article supplement (PMC8187907; doi:10.3389/fimmu.2021.648812), 2021-05-26
Supplement: DataSheet_2.pdf [file DataSheet_2.pdf]

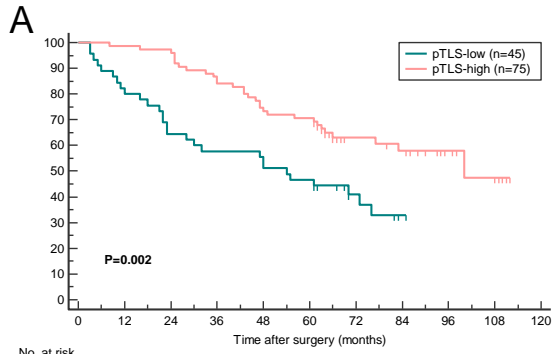

No. at risk

|                  |    |    |    |    |    |    |    |    |    |   |   |
|------------------|----|----|----|----|----|----|----|----|----|---|---|
| pTLS-low (n=45)  | 45 | 36 | 29 | 26 | 23 | 21 | 10 | 2  | 0  | 0 | 0 |
| pTLS-high (n=75) | 75 | 74 | 72 | 63 | 55 | 53 | 25 | 22 | 14 | 8 | 0 |

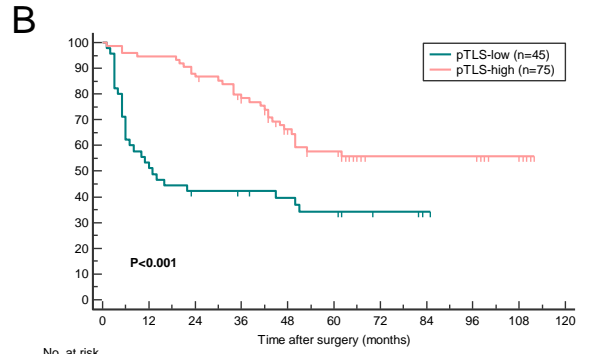

No. at risk

|                  |    |    |    |    |    |    |    |    |    |   |   |
|------------------|----|----|----|----|----|----|----|----|----|---|---|
| pTLS-low (n=45)  | 45 | 23 | 18 | 17 | 15 | 13 | 8  | 2  | 0  | 0 | 0 |
| pTLS-high (n=75) | 75 | 71 | 65 | 53 | 39 | 33 | 14 | 14 | 14 | 8 | 0 |
