# Supplementary material for: Peritumoral Tertiary Lymphoid Structures Correlate With Protective Immunity and Improved Prognosis in Patients With Hepatocellular Carcinoma
Source: PubMed Central journal article supplement (PMC8187907; doi:10.3389/fimmu.2021.648812), 2021-05-26
Supplement: DataSheet_3.pdf [file DataSheet_3.pdf]

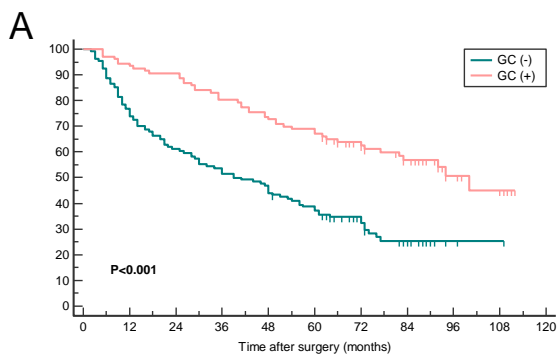

| No. at risk |  | 0   | 12 | 24 | 36 | 48 | 60 | 72 | 84 | 96 | 108 | 120 |
|-------------|--|-----|----|----|----|----|----|----|----|----|-----|-----|
| GC (-)      |  | 134 | 99 | 82 | 69 | 59 | 49 | 25 | 12 | 3  | 1   | 0   |
| GC (+)      |  | 106 | 99 | 96 | 85 | 77 | 71 | 47 | 35 | 12 | 7   | 0   |

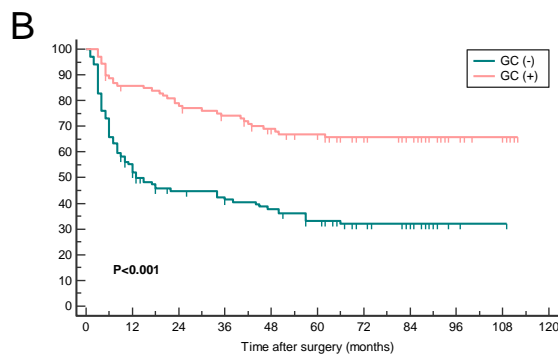

| No. at risk |  | 0   | 12 | 24 | 36 | 48 | 60 | 72 | 84 | 96 | 108 | 120 |
|-------------|--|-----|----|----|----|----|----|----|----|----|-----|-----|
| GC (-)      |  | 134 | 67 | 53 | 46 | 42 | 35 | 21 | 12 | 3  | 1   | 0   |
| GC (+)      |  | 106 | 88 | 80 | 74 | 64 | 58 | 40 | 31 | 12 | 7   | 0   |
