# Supplementary material for: Peritumoral Tertiary Lymphoid Structures Correlate With Protective Immunity and Improved Prognosis in Patients With Hepatocellular Carcinoma
Source: PubMed Central journal article supplement (PMC8187907; doi:10.3389/fimmu.2021.648812), 2021-05-26

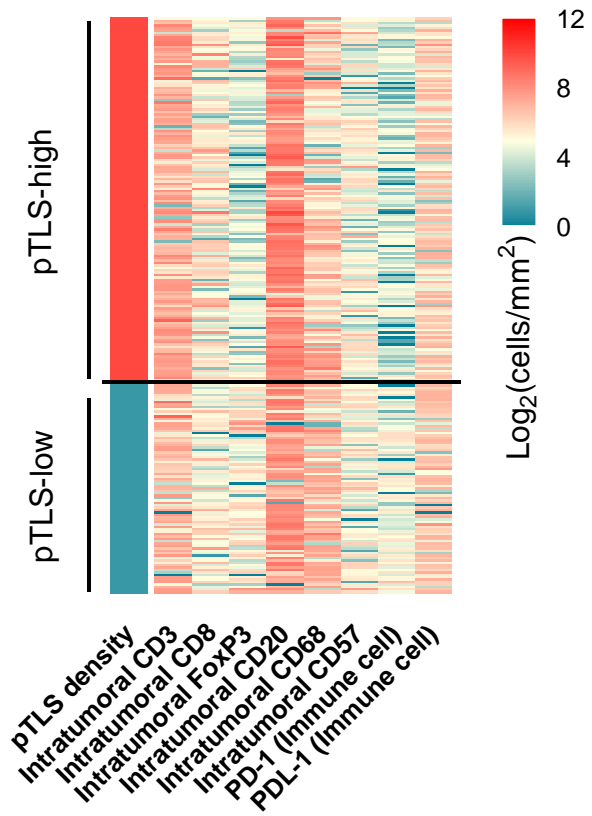

Supplement: DataSheet_4.pdf [file DataSheet_4.pdf]
